# Supplementary material for: Antisolvent effects in green solvent engineering of FA-based quasi-2D Ruddlesden–Popper perovskite films for efficient solar cells
Source: Royal Society of Chemistry journal article supplement (doi:10.1039/d4gc00235k), 2024-01-01
Supplement: d4gc00235k1.pdf [file d4gc00235k1.pdf]

## Supporting Information

# **Antisolvent Effects in Green Solvent Engineering of FA-based Quasi-2D Ruddlesden-Popper Perovskite Films for Efficient Solar Cells**

Guoshuai Zhang<sup>a</sup>, Jun Tang<sup>a</sup>, Chenming Wang<sup>a</sup>, Xianyao Wu<sup>a</sup>, Jie Chen<sup>a</sup>, Xi Wang<sup>a</sup>, Kai Wang<sup>a</sup>, Xixiang Zhu<sup>a</sup>, Haomiao Yu<sup>a</sup>, Jinpeng Li<sup>\*a</sup>

a. Key Laboratory of Luminescence and Optical Information, Ministry of Education, School of Physical Science and Engineering, Beijing Jiaotong University, Beijing, 100044, China

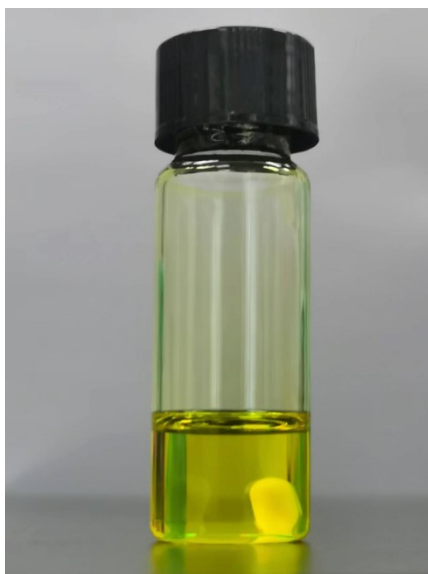

**Fig. S1** The optical image solution of FA-based quasi-2D perovskite in TEP.

**Table S1** Physical properties of solvents and antisolvents.

| Solvents                    | Boiling Point(°C) | Viscosity | Polarity | GHS symbol |
|-----------------------------|-------------------|-----------|----------|------------|
| N,N-Dimethylformamide (DMF) | 153               | 1.3       | 6.4      |            |
| Chlorobenzene (CB)          | 132               | 0.8       | 2.70     |            |
| Triethyl phosphate (TEP)    | 219               | 1.6       | 3.30     |            |
| Dibutyl ether (DBE)         | 143               | 0.7       | 0.72     |            |
| Petroleum ether(PE)         | 60~90             | 0.3       | 0.01     |            |

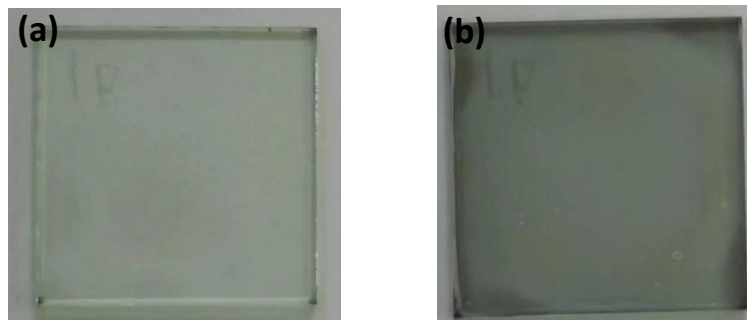

**Fig. S2** The photograph of films prepared from TEP without dipping antisolvent, (a) the unannealed film; (b) the annealed perovskite film.

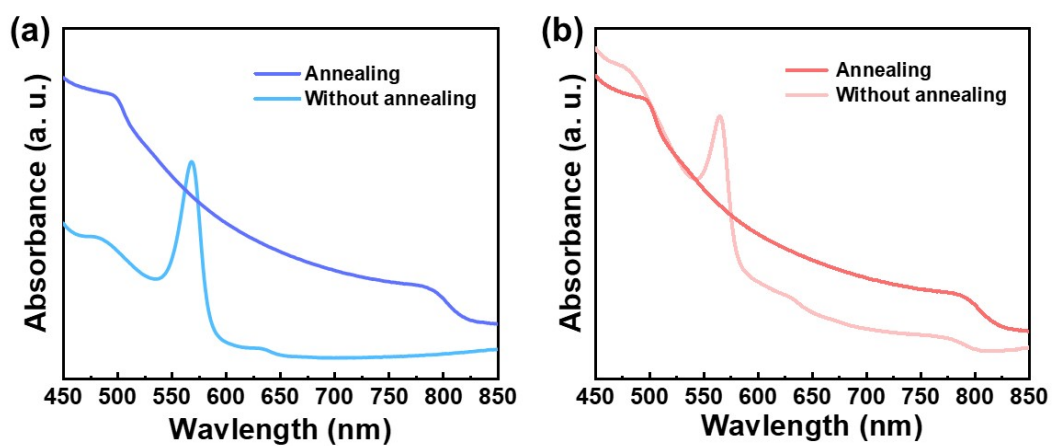

**Fig. S3** The UV absorption spectra of intermediate phase and quasi-2D perovskite film prepared from DBE and PE. (a) DBE; (b) PE.

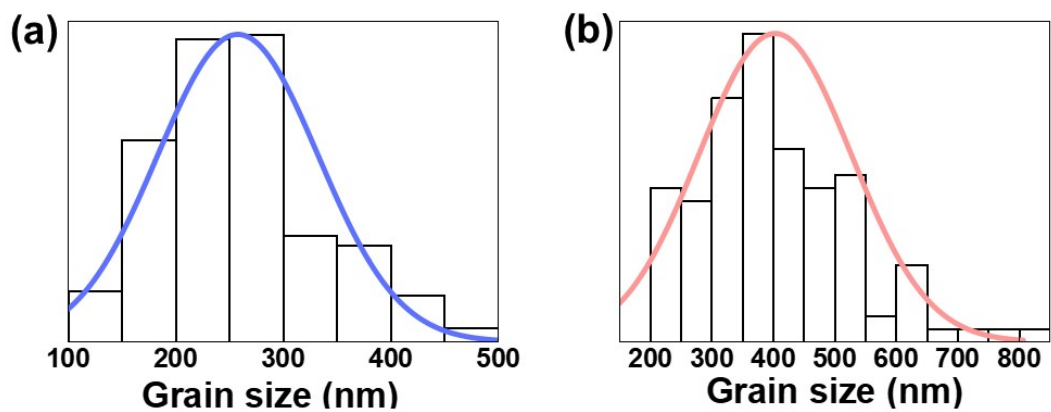

**Fig. S4** The distribution histogram of grain sizes from FA-based quasi-2D perovskite films fabricated with (a) DBE (b) PE.

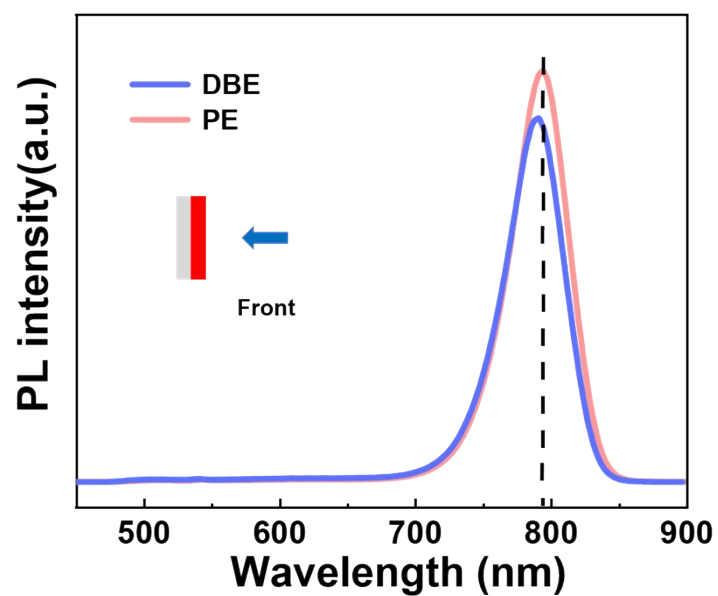

**Fig. S5** The steady-state PL spectra from top (film) to bottom (glass) side of prepared films.

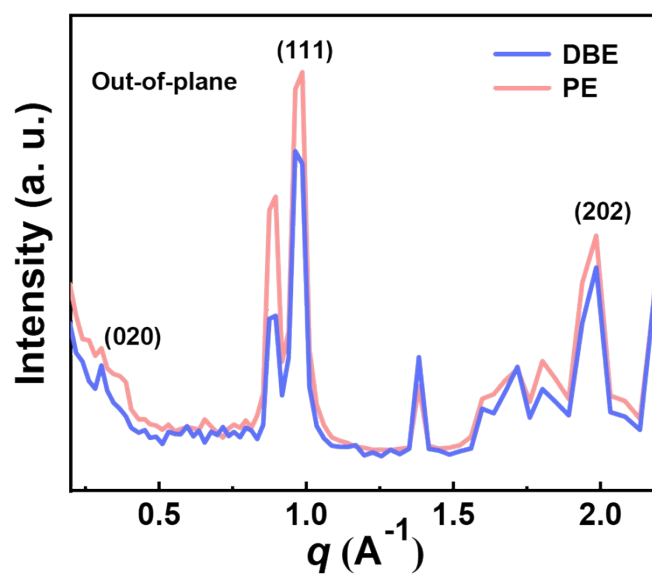

Fig. S6 The out-plane curves derived from GIWAXS patterns.

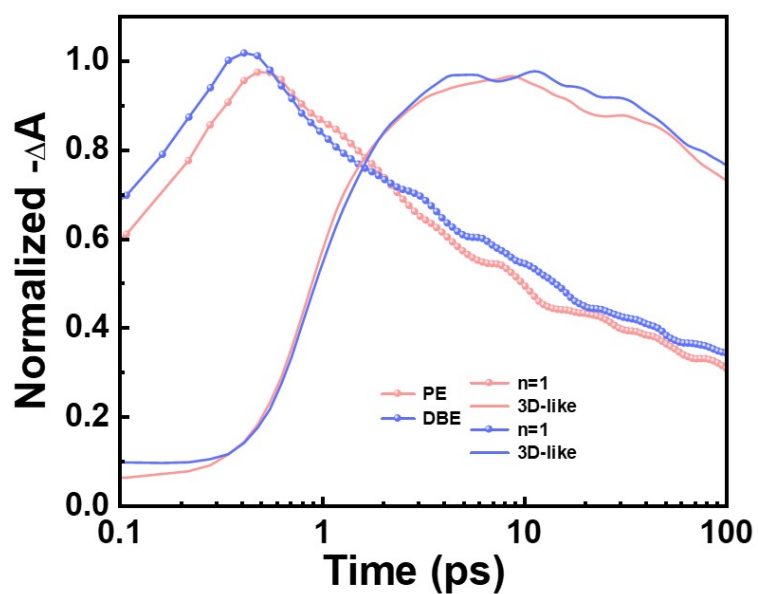

Fig. S7 The decay kinetics of different phases curves derived from TA spectral patterns.

**Table S2** The fitting results from transient absorption spectra.

| Antisolvent | n-          | $\tau_{\text{et}}$ (ps) | $\tau_1$ (ps) | $\tau_2$ (ps) | $\tau_3$ (ps) |
|-------------|-------------|-------------------------|---------------|---------------|---------------|
|             | s           | value                   |               |               |               |
| DBE         | n=1         | /                       | 2.15          | 30.24         | 133.0         |
|             | n= $\infty$ | 1.04                    | 195.5         | 836.8         | 3141          |
| PE          | n=1         | /                       | 0.216         | 3.257         | 72.22         |
|             | n= $\infty$ | 0.90                    | 136.4         | 672.4         | 3630.0        |

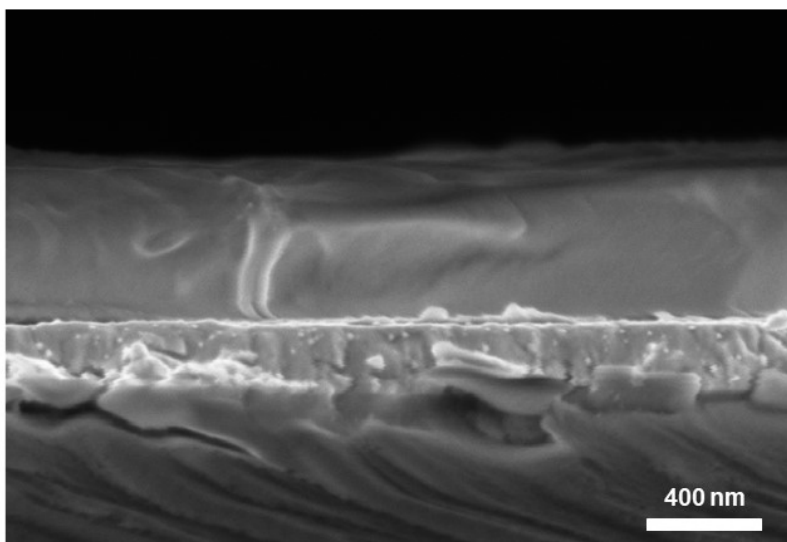

**Fig. S8** The cross-sectional SEM image of FA-based quasi-2D perovskite film fabricated with antisolvent of PE.

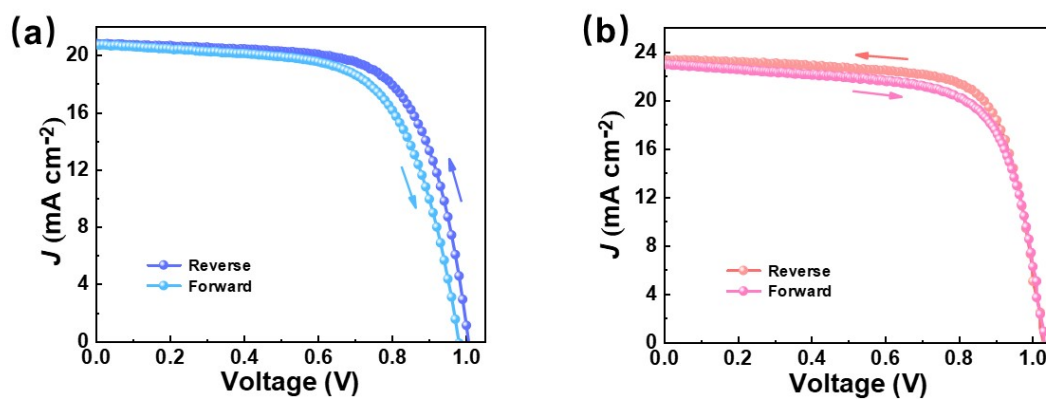

**Fig. S9** The  $J$ - $V$  curves obtained from reverse and forward scan of the best PSCs prepared from different antisolvents. (a) DBE; (b) PE.

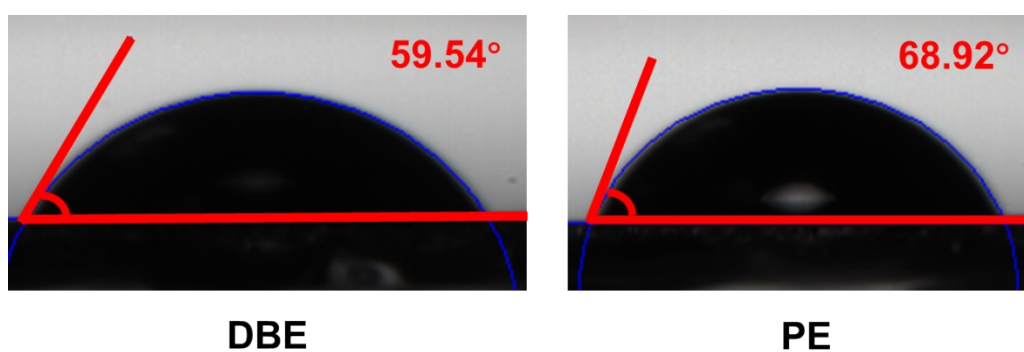

**Fig. S10** Water contact angle images of the FA-based quasi-2D perovskite films fabricated with antisolvent of DBE and PE.

**Table S3** The performance parameters of different n value FA-based quasi-2D perovskite solar cells prepared from traditional toxic solvent and green solvent system.

| Solvents        | Perovskites                                                                          | n | V <sub>oc</sub> (V) | J <sub>sc</sub> (mA cm <sup>-2</sup> ) | FF(%) | PCE(%) | Ref.         |
|-----------------|--------------------------------------------------------------------------------------|---|---------------------|----------------------------------------|-------|--------|--------------|
| DMF/CB          | BA <sub>2</sub> FA <sub>8</sub> Pb <sub>9</sub> I <sub>28</sub>                      | 9 | 1.102               | 18.89                                  | 63.22 | 13.16  | 1            |
| DMF/CB          | BA <sub>2</sub> FA <sub>8</sub> Pb <sub>9</sub> I <sub>28</sub>                      | 9 | 1.098               | 21.09                                  | 68.17 | 15.01  | 2            |
| DMF/CB          | (FPEA <sub>2</sub> FA <sub>8</sub> Pb <sub>9</sub> I <sub>28</sub> )                 | 9 | 1.07                | 20.88                                  | 72    | 16.15  | 3            |
| DMF/CB          | EA <sub>2</sub> FA <sub>8</sub> Pb <sub>9</sub> I <sub>28</sub>                      | 9 | 1.09                | 21.89                                  | 73.05 | 17.4   | 4            |
| DMF/IPA         | (ThMA) <sub>2</sub> FA <sub>4</sub> Pb <sub>5</sub> I <sub>16</sub>                  | 5 | 1.075               | 23.39                                  | 75.8  | 19.06  | 5            |
| DMF/<br>Anisole | (β-FPEA) <sub>2</sub> (FA) <sub>4</sub> Pb <sub>5</sub> I <sub>16</sub>              | 5 | 1.13                | 22.13                                  | 76.71 | 19.11  | 6            |
| DMF             | (4F-PEA) <sub>2</sub> FA <sub>4</sub> Pb <sub>5</sub> I <sub>16</sub>                | 5 | 1.18                | 21.7                                   | 80.35 | 21.07  | 7            |
| DMF             | PDAFA <sub>3</sub> Pb <sub>4</sub> I <sub>13</sub>                                   | 4 | 1.10                | 17.30                                  | 72.5  | 13.8   | 8            |
| DMF             | PDA <sub>0.9</sub> PA <sub>0.2</sub> FA <sub>3</sub> Pb <sub>4</sub> I <sub>13</sub> | 4 | 1.09                | 18.9                                   | 77.7  | 16.0   | 9            |
| DMF/IPA         | BA <sub>2</sub> FA <sub>3</sub> Pb <sub>4</sub> I <sub>13</sub>                      | 4 | 1.062               | 21.62                                  | 78.96 | 18.14  | 10           |
| DMF             | BDA(FA) <sub>3</sub> Pb <sub>4</sub> I <sub>13</sub>                                 | 4 | 1.15                | 19.5                                   | 76.4  | 17.2   | 11           |
| DMF             | BA <sub>2</sub> FA <sub>2</sub> Pb <sub>3</sub> I <sub>10</sub>                      | 3 | 0.98                | 11.89                                  | 59    | 6.88   | 12           |
| TEP/DEE         | BA <sub>2</sub> FA <sub>3</sub> Pb <sub>4</sub> I <sub>13</sub>                      | 4 | 1.00                | 20.83                                  | 68.7  | 14.31  | This<br>Work |
| TEP/PE          | BA <sub>2</sub> FA <sub>3</sub> Pb <sub>4</sub> I <sub>13</sub>                      | 4 | 1.03                | 23.34                                  | 72.5  | 17.42  | This<br>Work |

n defines the number of inorganic octahedron (MX<sub>6</sub>)<sup>4-</sup> slabs.



**Table S4** The fitting results of TRPL.

| Antisolvent<br>s | A <sub>1</sub> | $\tau_1$ (ns) | A <sub>2</sub> | $\tau_2$ (ns) | Average life time (ns) |
|------------------|----------------|---------------|----------------|---------------|------------------------|
| DBE              | 60%            | 38.1          | 40%            | 137.0         | 160                    |
| PE               | 33%            | 27.2          | 67%            | 220.9         | 78                     |

**Table S5** The fitting results of impedance spectroscopy spectra.

| Antisolvents | R <sub>s</sub> ( $\Omega$ ) | R <sub>rec</sub> ( $\Omega$ ) |
|--------------|-----------------------------|-------------------------------|
| DEE          | 53.11                       | 7984                          |
| PE           | 34.5                        | 56676                         |

## Reference

- [1] Y. Li, H. Li, L. Tian, Q. Wang, F. Wu, F. Zhang, L. Du, Y. Huang, *Journal of Materials Science: Materials in Electronics*, 2020, **31**, 12301-12308.
- [2] X. Shen , Y. Li, H. Li, Q. Wang , Z. Ma , C. Peng , W. Zhang , Y. Huang, *Materials Science in Semiconductor Processing*, 2022,**138**, 106296.
- [3] Y. Wei, B. Chen, F. Zhang, Y. Tian, X. Yang, B. Cai, J. Zhao, *Sol. RRL*, 2021, **5**, 2000661.
- [4] H. Zheng, G. Liu, L. Zhu, J. Ye, X. Zhang, A. Alsaedi, T. Hayat, X. Pan, S. Dai, *Adv. Energy Mater.*, 2018, **8**, 1800051.
- [5] H. Lai, D. Lu, Z. Xu, N. Zheng, Z. Xie, Y. Liu, *Adv. Mater.*, 2020, **32**, 2001470.
- [6] Y. Zhang, M. Chen, T. He, H. Chen, Z. Zhang, H. Wang, H. Lu, Q. Ling, Z. Hu, Y. Liu, Y. Chen, G. Long, *Adv. Mater.*, 2023, **35**, 2210836.
- [7] H. Lai, D. Lu, Z. Xu, N. Zheng, Z. Xie, Y. Liu, *Adv. Mater.*, 2020, **32**, 2001470.

- [8] L. Cheng, Z. Liu, S. Li, Y. Zhai, X. Wang, Z. Qiao, Q. Xu, K. Meng, Z. Zhu, G. Chen, *Angew. Chem., Int. Ed.*, 2021, **133**, 869-877.
- [9] L. Cheng, K. Meng, Z. Qiao, Y. Zhai, R. e Yu, L. Pan, B. Chen, M. Xiao, G. Chen, *Adv. Mater.*, 2022, **34**, 2106380.
- [10] W. Kong, F. Zeng, Z. Su, T. Wang, L. Qiao, T. Ye, L. Zhang, R. Sun, J. Barbaud, F. Li, X. Gao, R. Zheng, X. Yang, *Adv. Energy Mater.*, 2022, **12**, 2202704.
- [11] G. Wu, T. Liu, M. Hu, Z. Zhang, S. Li, L. Xiao, J. Guo, Y. Wang, A. Zhu, W. Li, H. Zhou, Y. Zhang, R. Chen, G. Xing, *Adv. Mater.*, 2023, **35**, 2303061.
- [12] J. Yan, W. Fu, X. Zhang, J. Chen, W. Yang, W. Qiuc, G. Wu, F. Liu, P. Heremansc, H. Chen, *Mater. Chem. Front.*, 2017, **2**, 121-128.
